# Supplementary material
Source: PubMed Central journal article supplement (PMC4857973)
Supplement: JVIM-28-630-s003.pdf [file JVIM-28-630-s003.pdf]

## Rater Questionnaire

**Validity & Reliability of the modified Mayhew Ataxia score.  
Instructions:**

Please do not to talk about the patient during the examination, until all raters have finished and handed in the assessment form.

Please fill in your ID-number. If you haven't received it or forgotten it please have Emil find your envelope.

Please evaluate each task immediately on the dedicated questionnaire page, finish and turn to the next page.

Please fill in the questionnaire as the examination progresses.

|               |         |  |         |  |
|---------------|---------|--|---------|--|
| Horse number: |         |  |         |  |
|               |         |  |         |  |
| Rater ID:     | Number: |  | Letter: |  |

| History                                              | Choice                   |
|------------------------------------------------------|--------------------------|
| Do you know this horse's history or source?          |                          |
| Yes                                                  | <input type="checkbox"/> |
| No                                                   | <input type="checkbox"/> |
| <b>If yes</b> , is the primary presenting complaint: |                          |
| A neurological disease?                              | <input type="checkbox"/> |
| A lameness problem?                                  | <input type="checkbox"/> |
| Abnormal gait of unknown aetiology?                  | <input type="checkbox"/> |
| The horse is <u>not</u> known to have a problem      | <input type="checkbox"/> |

### 1 – Walk and trot

| Walk and trot on a straight line, hard surface                    | Choice                   |
|-------------------------------------------------------------------|--------------------------|
| Do you think this horse's gait is (only <u>one</u> answer please) |                          |
| Normal?                                                           | <input type="checkbox"/> |
| Abnormal?                                                         | <input type="checkbox"/> |
| Do you think this horse is (only <u>one</u> answer please)        |                          |
| Lame?                                                             | <input type="checkbox"/> |
| Neurologic?                                                       | <input type="checkbox"/> |
| Lame AND Neurologic?                                              | <input type="checkbox"/> |
| Normal?                                                           | <input type="checkbox"/> |
| I don't know                                                      | <input type="checkbox"/> |
| <b>IF Lame</b> , which leg(s) is it lame on?                      |                          |
| Left Thoracic limb?                                               | <input type="checkbox"/> |
| Right Thoracic limb?                                              | <input type="checkbox"/> |
| Left Pelvic limb?                                                 | <input type="checkbox"/> |
| Right Pelvic limb?                                                | <input type="checkbox"/> |
| <b>IF Neurologic</b> , is it                                      |                          |
| Ataxic?                                                           | <input type="checkbox"/> |
| Paretic?                                                          | <input type="checkbox"/> |
| Ataxic and Paretic?                                               | <input type="checkbox"/> |

Please grade (**neurological**):

| 0                | 1                                               | 2                          | 3                                 | 4                                       | 5         |
|------------------|-------------------------------------------------|----------------------------|-----------------------------------|-----------------------------------------|-----------|
| No gait deficits | No deficits identified at the walk.             | Deficits noted at the walk | Marked deficits noted at the walk | Severe deficits noted at the walk.      | Recumbent |
|                  | Deficits only identified during further testing |                            |                                   | May fall or nearly fall at normal gaits |           |

Please grade (**musculoskeletal**):

| 0     | 1 | 2 | 3 | 4 | 5 | 6 | 7 | 8 | 9 | 10                 |
|-------|---|---|---|---|---|---|---|---|---|--------------------|
| Sound |   |   |   |   |   |   |   |   |   | Non Weight Bearing |

I cannot evaluate this based on the video

|           |         |  |         |  |          |  |             |
|-----------|---------|--|---------|--|----------|--|-------------|
| Rater ID: | Number: |  | Letter: |  | Horse ID |  | Page 1 / 11 |
|-----------|---------|--|---------|--|----------|--|-------------|

|           |         |  |         |  |          |  |             |
|-----------|---------|--|---------|--|----------|--|-------------|
| Rater ID: | Number: |  | Letter: |  | Horse ID |  | Page 2 / 11 |
|-----------|---------|--|---------|--|----------|--|-------------|

## 2 – Head elevation, straight line

| Head elevation, straight line                                                          | Choice                   |                          |
|----------------------------------------------------------------------------------------|--------------------------|--------------------------|
| Do you think this horse's gait is (only <u>one</u> answer please)                      |                          |                          |
| Normal?                                                                                | <input type="checkbox"/> |                          |
| Abnormal?                                                                              | <input type="checkbox"/> |                          |
|                                                                                        | <b>Yes</b>               | <b>No</b>                |
| <b>If abnormal</b> , is the horse's gait deficit more readily identified on this test? | <input type="checkbox"/> | <input type="checkbox"/> |
| Does the horse make foot placement mistakes (toe dragging, knuckling, stumbling)       | <input type="checkbox"/> | <input type="checkbox"/> |
| Is the horse paretic?                                                                  | <input type="checkbox"/> | <input type="checkbox"/> |
| Is the horse ataxic?                                                                   | <input type="checkbox"/> | <input type="checkbox"/> |
| Is the horse hypermetric?                                                              | <input type="checkbox"/> | <input type="checkbox"/> |
| Is the horse hypometric?                                                               | <input type="checkbox"/> | <input type="checkbox"/> |
| Is the horse both ataxic and hypermetric?                                              | <input type="checkbox"/> | <input type="checkbox"/> |

I cannot evaluate this based on the video

## 3 – Walk with blindfold

| Walk with blindfold                                                                    | Choice                   |                          |
|----------------------------------------------------------------------------------------|--------------------------|--------------------------|
| Do you think this horse's gait is (only <u>one</u> answer please)                      |                          |                          |
| Normal?                                                                                | <input type="checkbox"/> |                          |
| Abnormal?                                                                              | <input type="checkbox"/> |                          |
|                                                                                        | <b>Yes</b>               | <b>No</b>                |
| <b>If abnormal</b> , is the horse's gait deficit more readily identified on this test? | <input type="checkbox"/> | <input type="checkbox"/> |

I cannot evaluate this based on the video

## 4 – Standing tail pull

| Standing tail pull                                                                  | Choice                   |                          |
|-------------------------------------------------------------------------------------|--------------------------|--------------------------|
| Do you think this is (only <u>one</u> answer please)                                |                          |                          |
| Normal?                                                                             | <input type="checkbox"/> |                          |
| Abnormal?                                                                           | <input type="checkbox"/> |                          |
|                                                                                     | <b>Yes</b>               | <b>No</b>                |
| <b>If abnormal</b> , is the horse's deficit more readily identifiable on this test? | <input type="checkbox"/> | <input type="checkbox"/> |

I cannot evaluate this based on the video

## 5 – Walking tail pull

| Walking tail pull                                                                      | Choice                   |                          |
|----------------------------------------------------------------------------------------|--------------------------|--------------------------|
| Do you think this is (only <u>one</u> answer please)                                   |                          |                          |
| Normal?                                                                                | <input type="checkbox"/> |                          |
| Abnormal?                                                                              | <input type="checkbox"/> |                          |
|                                                                                        | <b>Yes</b>               | <b>No</b>                |
| <b>If abnormal</b> , is the horse's gait deficit more readily identified on this test? | <input type="checkbox"/> | <input type="checkbox"/> |

**6 – Walk, small circles**

| <b>Walk, circles</b>                                                                   |                          |                          |
|----------------------------------------------------------------------------------------|--------------------------|--------------------------|
| Do you think this horse's gait is (only <u>one</u> answer please)                      |                          |                          |
| Normal?                                                                                | <input type="checkbox"/> | <input type="checkbox"/> |
| Abnormal?                                                                              | <input type="checkbox"/> | <input type="checkbox"/> |
|                                                                                        | <b>Left rein</b>         | <b>Right rein</b>        |
| Is the horse circumducting its pelvic limb(s)?                                         | <input type="checkbox"/> | <input type="checkbox"/> |
|                                                                                        | <b>Yes</b>               | <b>No</b>                |
| <b>If abnormal</b> , is the horse's gait deficit more readily identified on this test? | <input type="checkbox"/> | <input type="checkbox"/> |
| Is the horse turning normally on its pelvic limbs?                                     | <input type="checkbox"/> | <input type="checkbox"/> |
| Is the horse turning normally on its thoracic limbs?                                   | <input type="checkbox"/> | <input type="checkbox"/> |

I cannot evaluate this based on the video

**7 – Backing up**

| <b>Backing up</b>                                                                 |                          |                          |
|-----------------------------------------------------------------------------------|--------------------------|--------------------------|
| Do you think this horse backs up (only <u>one</u> answer please)                  |                          |                          |
| Normally?                                                                         | <input type="checkbox"/> |                          |
| Abnormally?                                                                       | <input type="checkbox"/> |                          |
|                                                                                   | <b>Yes</b>               | <b>No</b>                |
| <b>If abnormal</b> , is the horse's deficit more readily identified on this test? | <input type="checkbox"/> | <input type="checkbox"/> |

I cannot evaluate this based on the video

**8 – Limb placement**

| <b>Limb placement</b>                                                             | <b>Choice</b>            |                          |
|-----------------------------------------------------------------------------------|--------------------------|--------------------------|
| Do you think this horse's limb placement is                                       |                          |                          |
| Normal (please circle)?                                                           | LF                       | RF                       |
| Abnormal (please circle)?                                                         | LF                       | RF                       |
| <b>If abnormal</b> , is the horse's deficit more readily identified on this test? | <b>Yes</b>               | <b>No</b>                |
|                                                                                   | <input type="checkbox"/> | <input type="checkbox"/> |

I cannot evaluate this based on the video

**9 – Walk over obstacle**

| <b>Walk over obstacle</b>                                                                  | <b>Choice</b>            |                          |
|--------------------------------------------------------------------------------------------|--------------------------|--------------------------|
| Do you think this horse's gait is (only <u>one</u> answer please)                          |                          |                          |
| Normal?                                                                                    | <input type="checkbox"/> |                          |
| Abnormal?                                                                                  | <input type="checkbox"/> |                          |
| <b>If Abnormal</b> , is the horse's gait deficit more readily identified on this test?     | <b>Yes</b>               | <b>No</b>                |
|                                                                                            | <input type="checkbox"/> | <input type="checkbox"/> |
| Does the horse make mistakes?                                                              | <input type="checkbox"/> | <input type="checkbox"/> |
| <b>If making mistakes</b> , do the mistakes suggest neurological compromise?               | <input type="checkbox"/> | <input type="checkbox"/> |
| <b>If making mistakes</b> , please circle the limb(s) in which you have detected a deficit | LF                       | RF                       |
|                                                                                            | LH                       | RH                       |

I cannot evaluate this based on the video

**10 – Cutaneus trunci reflex**

|                                     |                     |        |           |
|-------------------------------------|---------------------|--------|-----------|
| Please <b>circle for LEFT SIDE</b>  | Decreased or absent | Normal | Increased |
| Please <b>circle for RIGHT SIDE</b> | Decreased or absent | Normal | Increased |

I cannot evaluate this based on the video

**11 – Cervicofacial reflex**

|                                     |                     |        |           |
|-------------------------------------|---------------------|--------|-----------|
| Please <b>circle for LEFT SIDE</b>  | Decreased or absent | Normal | Increased |
| Please <b>circle for RIGHT SIDE</b> | Decreased or absent | Normal | Increased |

I cannot evaluate this based on the video

**12 – Hopping (thoracic limbs only)**

| Hopping                                                                                          | Choice                   |                          |
|--------------------------------------------------------------------------------------------------|--------------------------|--------------------------|
| Is this:<br>Normal?                                                                              | <input type="checkbox"/> |                          |
| Abnormal?                                                                                        | <input type="checkbox"/> |                          |
|                                                                                                  | Yes                      | No                       |
| Does the horse excessively shift weight onto the pelvic limbs when hopping?                      | <input type="checkbox"/> | <input type="checkbox"/> |
| Does the horse stumble or have difficulty when hopping?                                          | <input type="checkbox"/> | <input type="checkbox"/> |
| <b>If abnormal</b> , is the horse's deficit more readily identified on this test?                | <input type="checkbox"/> | <input type="checkbox"/> |
| <b>If abnormal</b> , is the problem asymmetric?                                                  | <input type="checkbox"/> | <input type="checkbox"/> |
| <b>If asymmetric</b> , which limb did the horse have most difficulty hopping on? (Please circle) | LF                       | RF                       |

I cannot evaluate this based on the video

**13 – Slope: Walk up and down**

| Slope: Walk up and down                                                                | Choice                   |                          |
|----------------------------------------------------------------------------------------|--------------------------|--------------------------|
| Do you think this horse's gait is (only <u>one</u> answer please)                      |                          |                          |
| Normal?                                                                                | <input type="checkbox"/> |                          |
| Abnormal?                                                                              | <input type="checkbox"/> |                          |
|                                                                                        | Yes                      | No                       |
| <b>If abnormal</b> , is the horse's gait deficit more readily identified on this test? | <input type="checkbox"/> | <input type="checkbox"/> |
| Does the horse make foot placement mistakes (toe dragging, knuckling, stumbling)       | <input type="checkbox"/> | <input type="checkbox"/> |
| Is the horse parietic?                                                                 | <input type="checkbox"/> | <input type="checkbox"/> |
| Is the horse ataxic?                                                                   | <input type="checkbox"/> | <input type="checkbox"/> |
| Is the horse hypermetric?                                                              | <input type="checkbox"/> | <input type="checkbox"/> |
| Is the horse both ataxic and hypermetric (ie. Dysmetric)?                              | <input type="checkbox"/> | <input type="checkbox"/> |

I cannot evaluate this based on the video

**14 – Slope: Walk up and down with head elevated**

| <b>Slope: Walk up and down</b>                                                         | <b>Choice</b>            |                          |
|----------------------------------------------------------------------------------------|--------------------------|--------------------------|
| Do you think this horse's gait is (only <u>one</u> answer please)                      |                          |                          |
| Normal?                                                                                | <input type="checkbox"/> |                          |
| Abnormal?                                                                              | <input type="checkbox"/> |                          |
|                                                                                        | <b>Yes</b>               | <b>No</b>                |
| <b>If abnormal</b> , is the horse's gait deficit more readily identified on this test? | <input type="checkbox"/> | <input type="checkbox"/> |
| Does the horse make foot placement mistakes (toe dragging, knuckling, stumbling)       | <input type="checkbox"/> | <input type="checkbox"/> |
| Is the horse paretic?                                                                  | <input type="checkbox"/> | <input type="checkbox"/> |
| Is the horse ataxic?                                                                   | <input type="checkbox"/> | <input type="checkbox"/> |
| Is the horse hypermetric?                                                              | <input type="checkbox"/> | <input type="checkbox"/> |
| Is the horse both ataxic and hypermetric (ie. Dysmetric)?                              | <input type="checkbox"/> | <input type="checkbox"/> |

I cannot evaluate this based on the video

**15 – Across all clinical gait evaluation tests**

| <b>Overall opinion</b>                                                                                               | <b>Choice</b>            |
|----------------------------------------------------------------------------------------------------------------------|--------------------------|
| Do you think this horse is (only <u>one</u> answer please)                                                           |                          |
| Lame?                                                                                                                | <input type="checkbox"/> |
| Neurologic?                                                                                                          | <input type="checkbox"/> |
| Lame AND Neurologic?                                                                                                 | <input type="checkbox"/> |
| Normal?                                                                                                              | <input type="checkbox"/> |
| Don't know                                                                                                           | <input type="checkbox"/> |
| <b>If lame and neurological, do you think?</b>                                                                       |                          |
| The horse is likely to have <u>two separate problems</u> (ie. the lameness is due to a separate orthopaedic problem) | <input type="checkbox"/> |
| The lameness and neurological signs are caused by the <u>same problem</u>                                            | <input type="checkbox"/> |
| I don't know                                                                                                         | <input type="checkbox"/> |

Please grade for each limb:

|                          | <b>LF</b> | <b>RF</b> | <b>LH</b> | <b>RH</b> |
|--------------------------|-----------|-----------|-----------|-----------|
| <b>Lameness<br/>0-10</b> |           |           |           |           |
| <b>Ataxia<br/>0-5</b>    |           |           |           |           |
| <b>Paresis<br/>0-5</b>   |           |           |           |           |

Please grade overall (**musculoskeletal**):

|       | <b>0</b> | <b>1</b> | <b>2</b> | <b>3</b> | <b>4</b> | <b>5</b> | <b>6</b> | <b>7</b> | <b>8</b> | <b>9</b> | <b>10</b>          |
|-------|----------|----------|----------|----------|----------|----------|----------|----------|----------|----------|--------------------|
| Sound |          |          |          |          |          |          |          |          |          |          | Non Weight Bearing |

Please grade overall (**neurological**), Ataxia scale

| <b>0</b>         | <b>1</b>                                        | <b>2</b>                   | <b>3</b>                          | <b>4</b>                                | <b>5</b>  |
|------------------|-------------------------------------------------|----------------------------|-----------------------------------|-----------------------------------------|-----------|
| No gait deficits | No deficits identified at the walk.             | Deficits noted at the walk | Marked deficits noted at the walk | Severe deficits noted at the walk.      | Recumbent |
|                  | Deficits only identified during further testing |                            |                                   | May fall or nearly fall at normal gaits |           |

I cannot evaluate this based on the video

Other general comments:
